# Supplementary material for: Artificial Light at Night Drives Earlier Singing in a Neotropical Bird
Source: MDPI journal article supplement (doi:10.3390/ani12081015), 2022-04-13
Supplement: s1 [file s1]

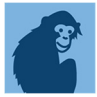

Supplementary materials

# Artificial Light at Night Drives Earlier Singing in a Neotropical Bird

Oscar Humberto Marín Gómez <sup>1,2</sup>

<sup>1</sup> Programa de Biología. Grupo de Biodiversidad y Educación Ambiental, Grupo de Investigación y Asesoría en Estadística, Carrera 15 #12N, Armenia, 630004, Colombia; [oschumar@iztacala.unam.mx](mailto:oschumar@iztacala.unam.mx)

<sup>2</sup> Laboratorio de Ecología, Unidad de Biotecnología y Prototipos (UBIPRO), Facultad de Estudios Superiores Iztacala Universidad Nacional Autónoma de México, Av. de los Barrios 1, Los Reyes Iztacala, Tlalnepantla 54090, Mexico

**Citation:** Marín Gómez, O.H.

Artificial Light at Night Drives

Earlier Singing in a Neotropical Bird.

*Animals* **2022**, *11*, 1015. [https://](https://doi.org/10.3390/ani12081015)

[doi.org/10.3390/ani12081015](https://doi.org/10.3390/ani12081015)

Academic Editor: Kylie Robert

Received: 13 March 2022

Accepted: 12 April 2022

Published: 13 April 2022

**Publisher's Note:** MDPI stays neutral with regard to jurisdictional claims in published maps and institutional affiliations.

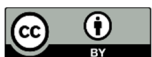

**Copyright:** © 2022 by the authors.

Submitted for possible open access publication under the terms and conditions of the Creative Commons Attribution (CC BY) license (<https://creativecommons.org/licenses/by/4.0/>).

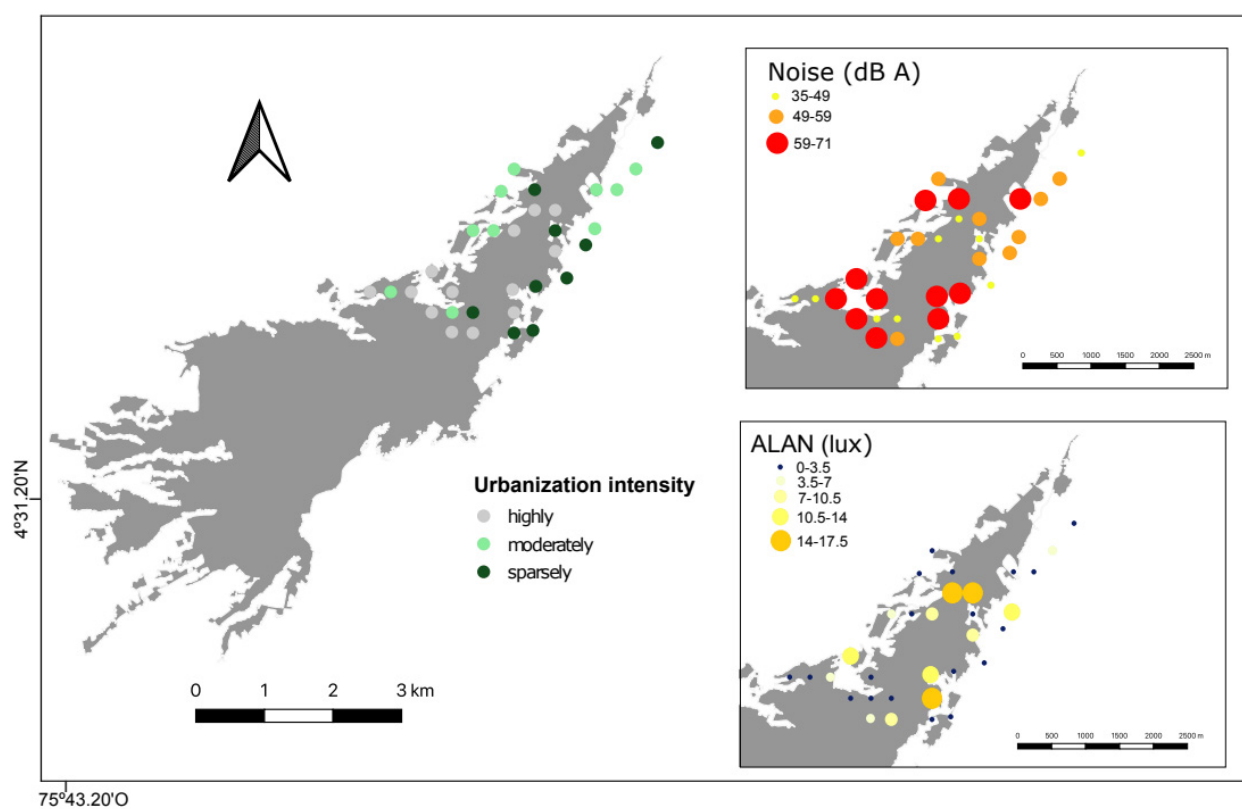

**Figure S1.** Map of the Armenia city showing the studied locations according to urbanization intensity, anthropogenic noise levels a and artificial light levels at dawn.

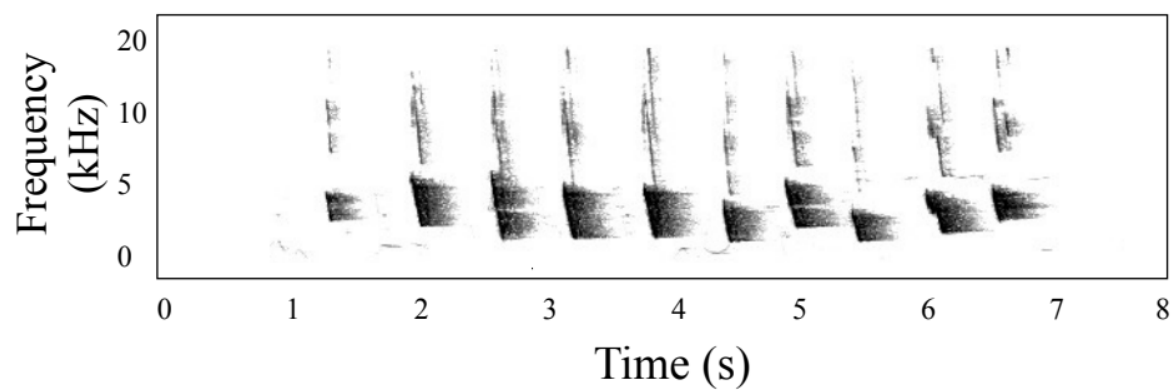

**Figure S2.** Spectrogram of the dawn song of the Saffron Finch recorded in this study.

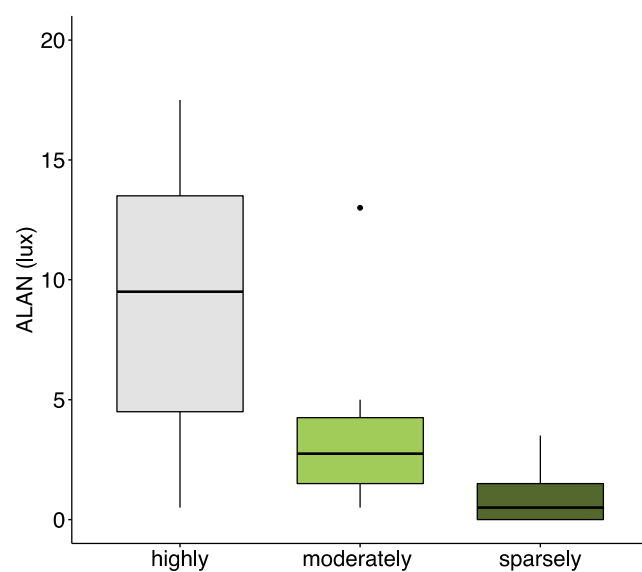

**Figure S3.** Variation of ALAN levels among urbanization conditions in the Armenia city, Colombia. The outlier point in the moderately urbanization condition represents a sampling point just under the light poles.

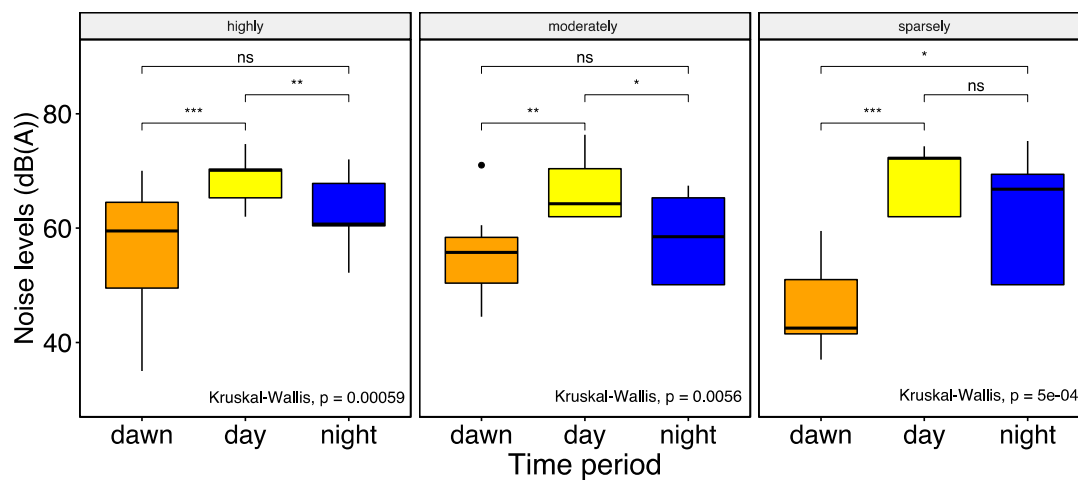

**Figure S4.** Variation of anthropogenic noise levels among urbanization conditions in the Armenia city, Colombia. The outlier point in the moderately urbanization condition represents a sampling point under high levels of traffic. \*  $p < 0.05$ , \*\*  $p < 0.01$ , \*\*\*  $p < 0.001$ .
